# Supplementary material for: Introducing a green nanocatalytic process toward the synthesis of benzo[a]pyrano-[2,3-c]phenazines utilizing copper oxide quantum dot-modified core–shell magnetic mesoporous silica nanoparticles as high throughput and reusable nanocatalysts
Source: Royal Society of Chemistry journal article supplement (doi:10.1039/d2ra03887k), 2022-01-01
Supplement: d2ra03887k1.pdf [file d2ra03887k1.pdf]

# Introducing a green nanocatalytic process toward the synthesis of benzo[*a*]pyrano-[2,3-*c*]phenazines utilizing copper oxide quantum dots-modified core-shell magnetic silica mesoporous nanocatalysts as high throughput and reusable nanocatalysts

Mohadeseh Dehnavian, Abdulhamid Dehghani, Leila Moradi\*

Department of Organic Chemistry, Faculty of Chemistry, University of Kashan, Kashan, Iran, P.O. Box

8731753153, +983155912336

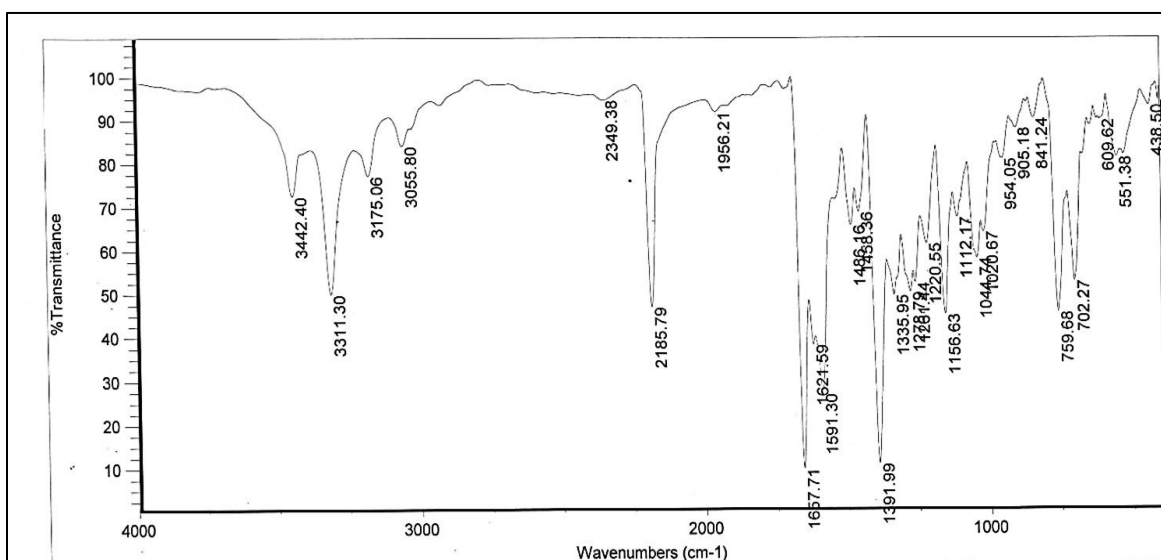

FTIR of 5a

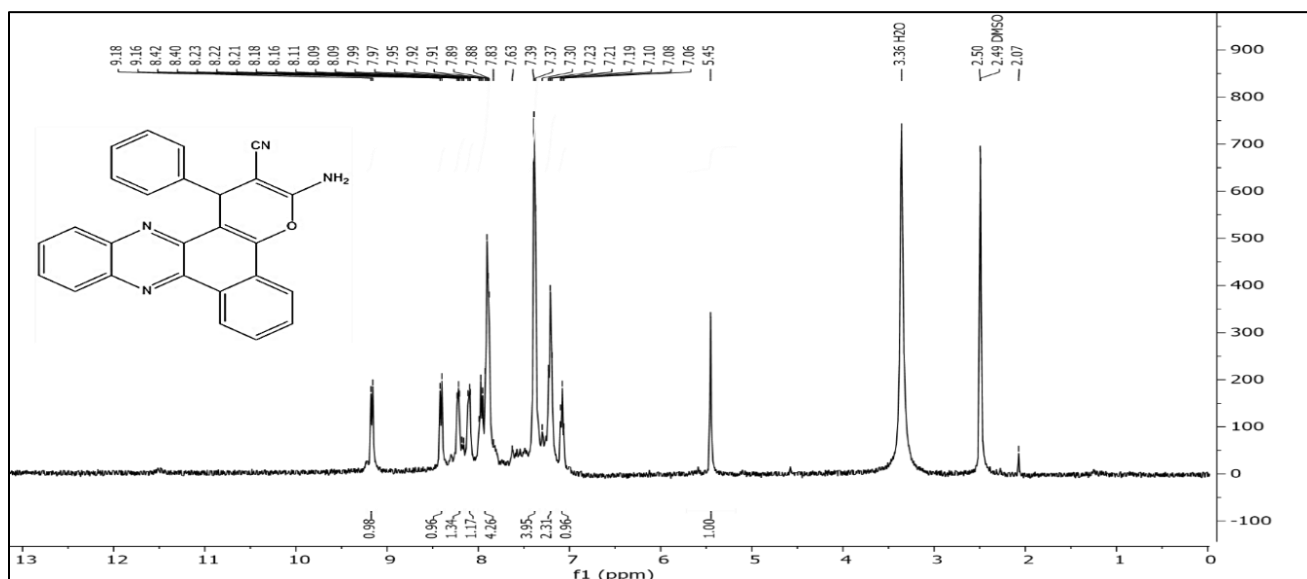

<sup>1</sup>H NMR of 5a

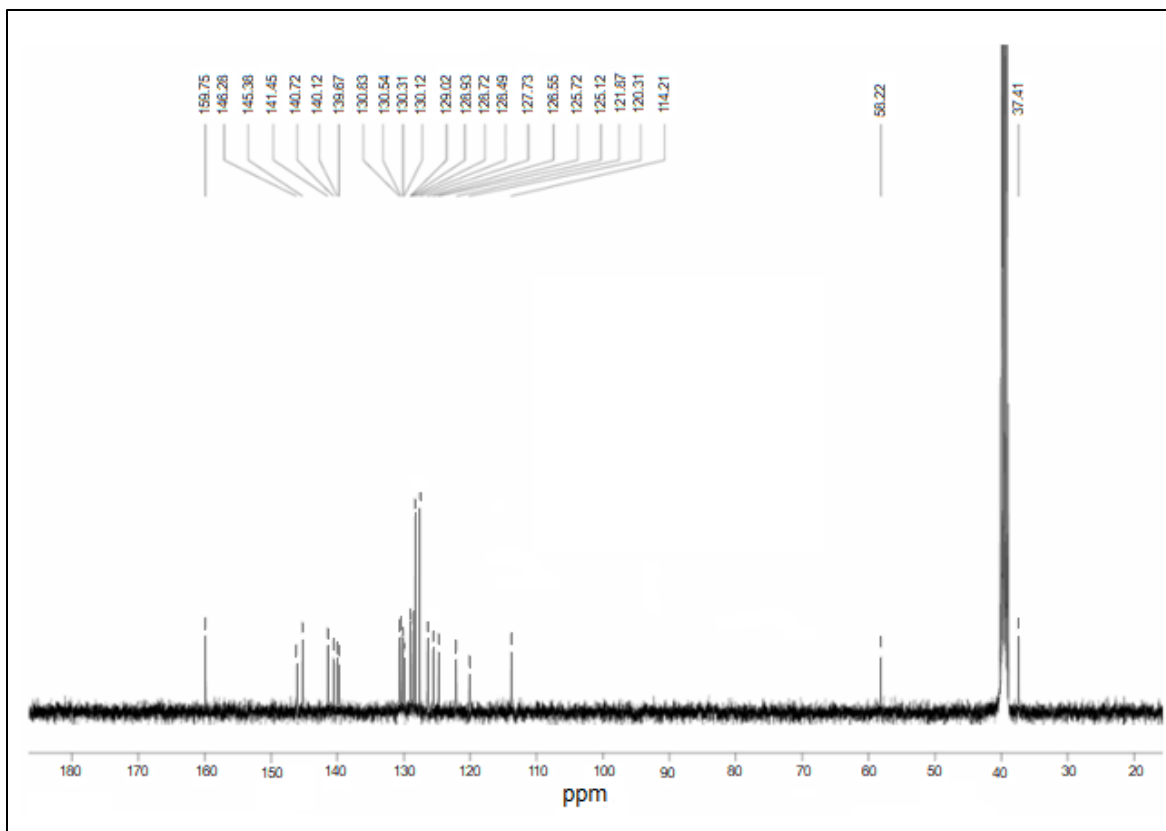

<sup>13</sup>C NMR of 5a

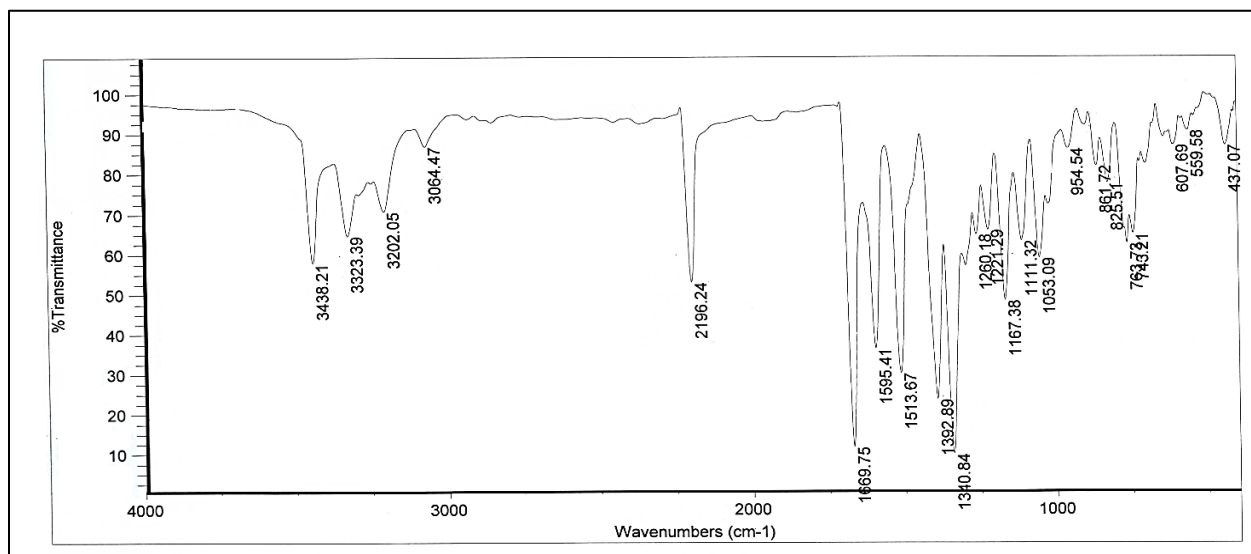

FTIR of 5b

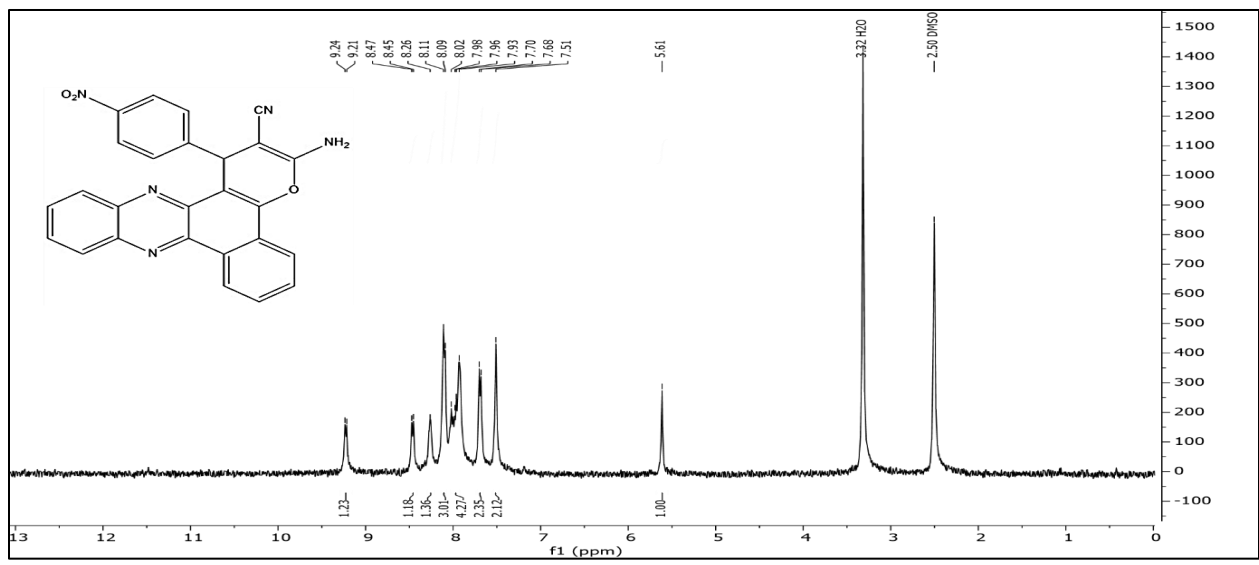

<sup>1</sup>H NMR of 5b

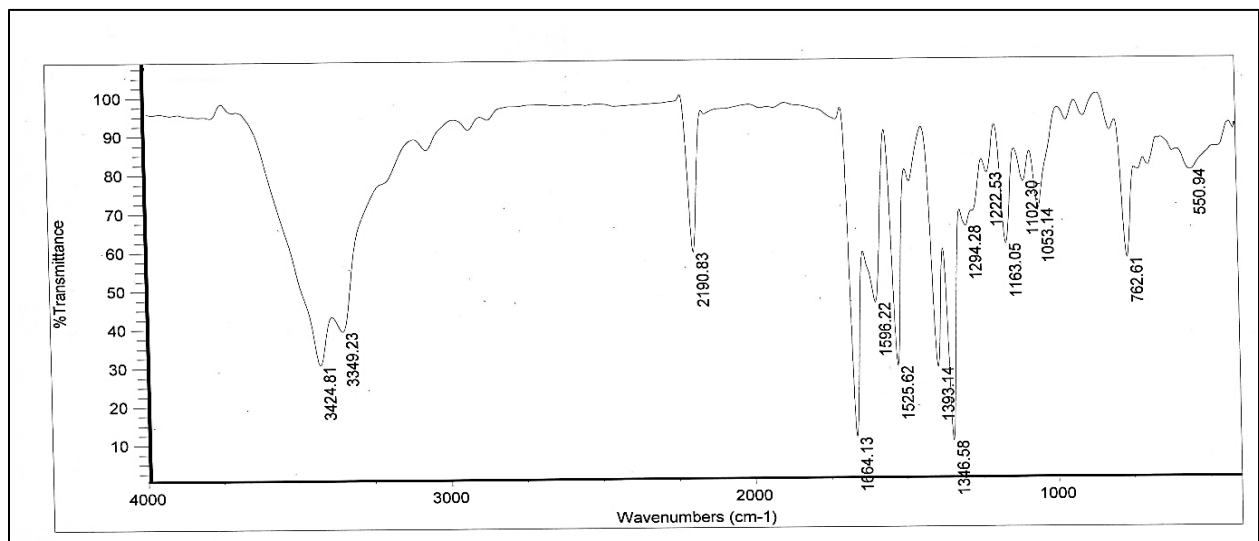

FTIR of 5c

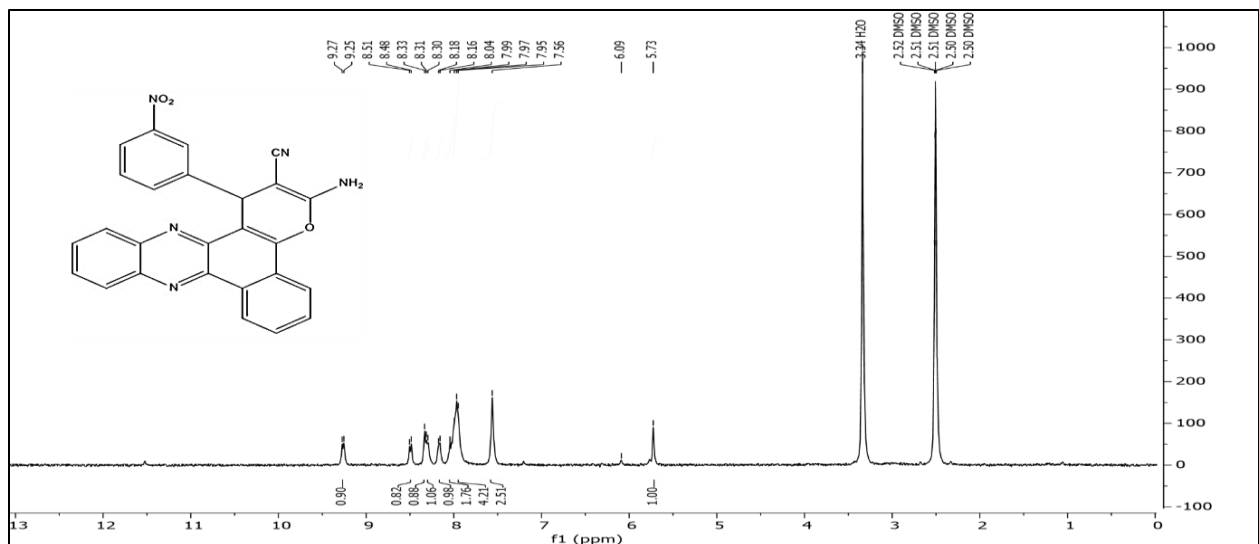

<sup>1</sup>H NMR of 5c

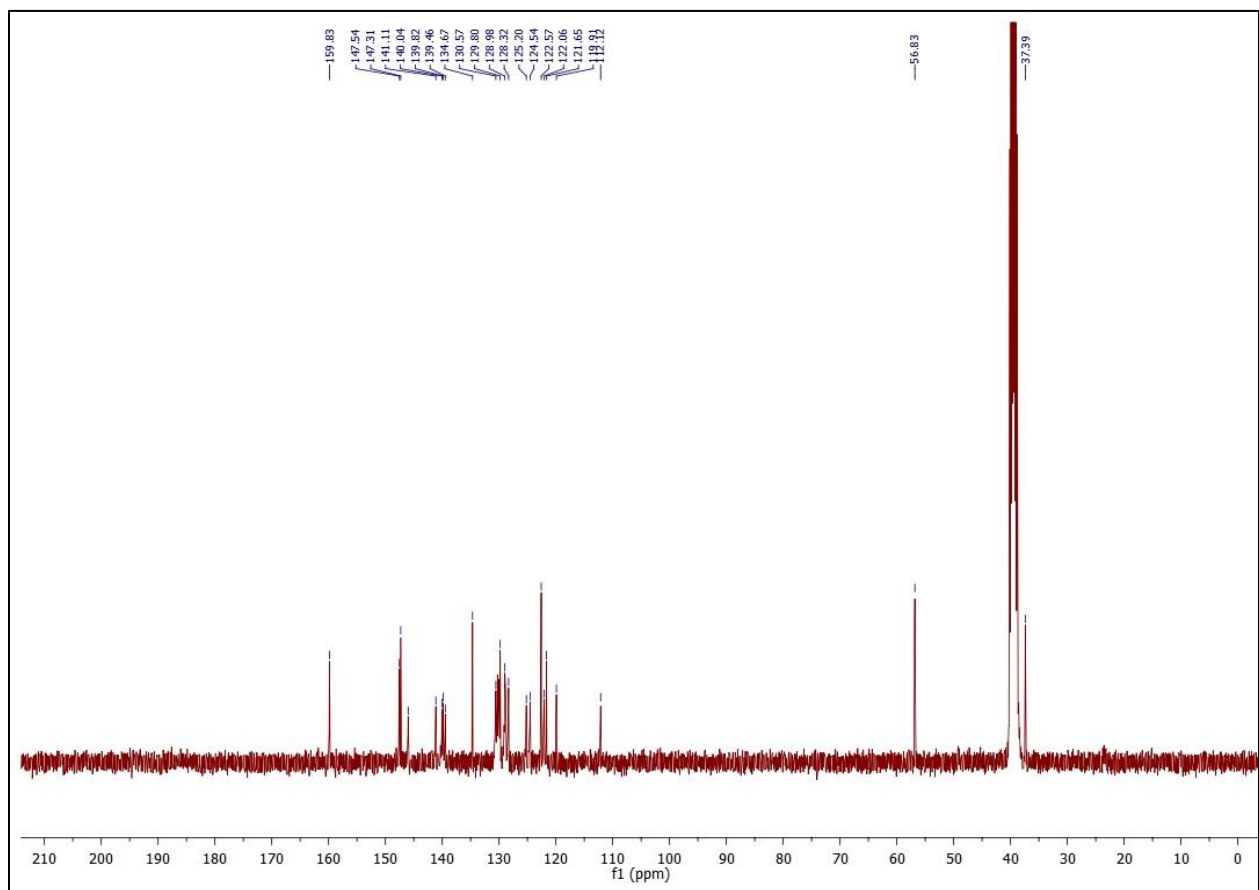

<sup>13</sup>C NMR of 5c

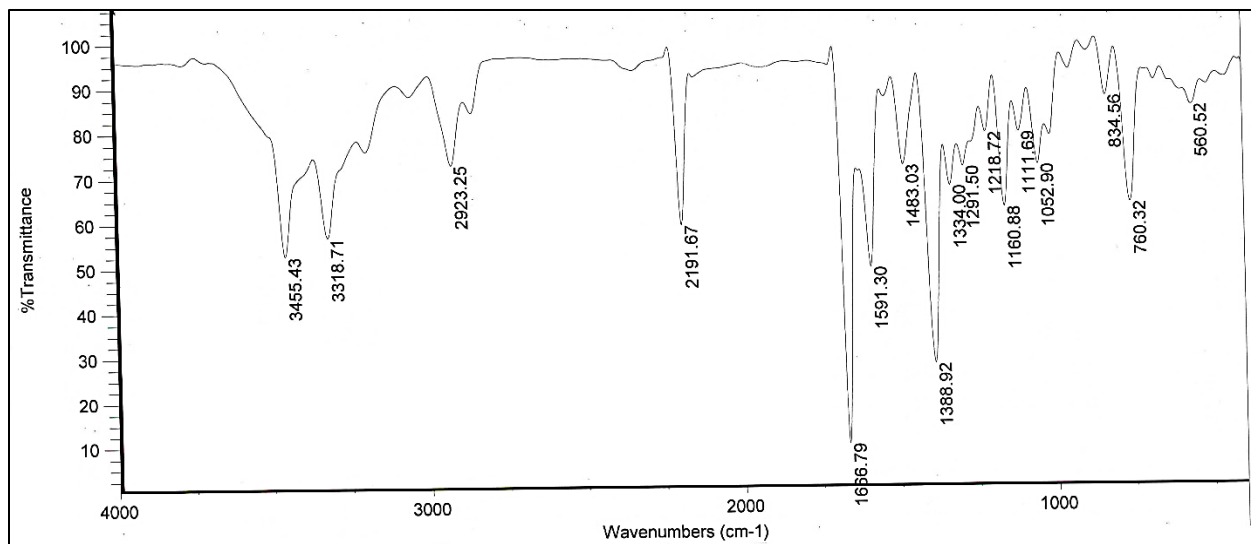

FTIR of 5d

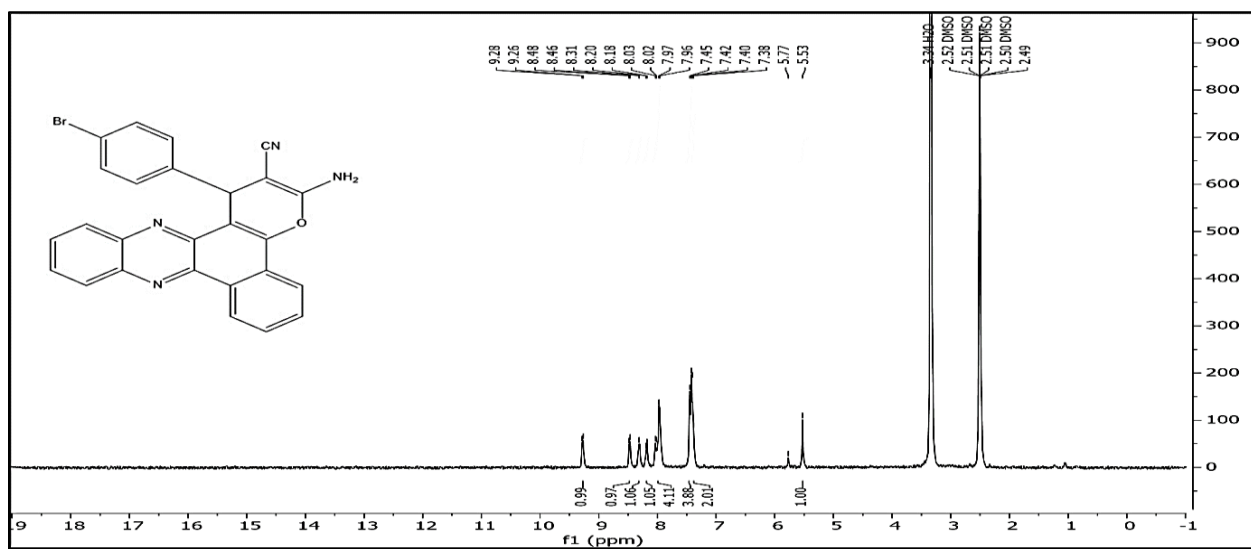

<sup>1</sup>H NMR of 5d

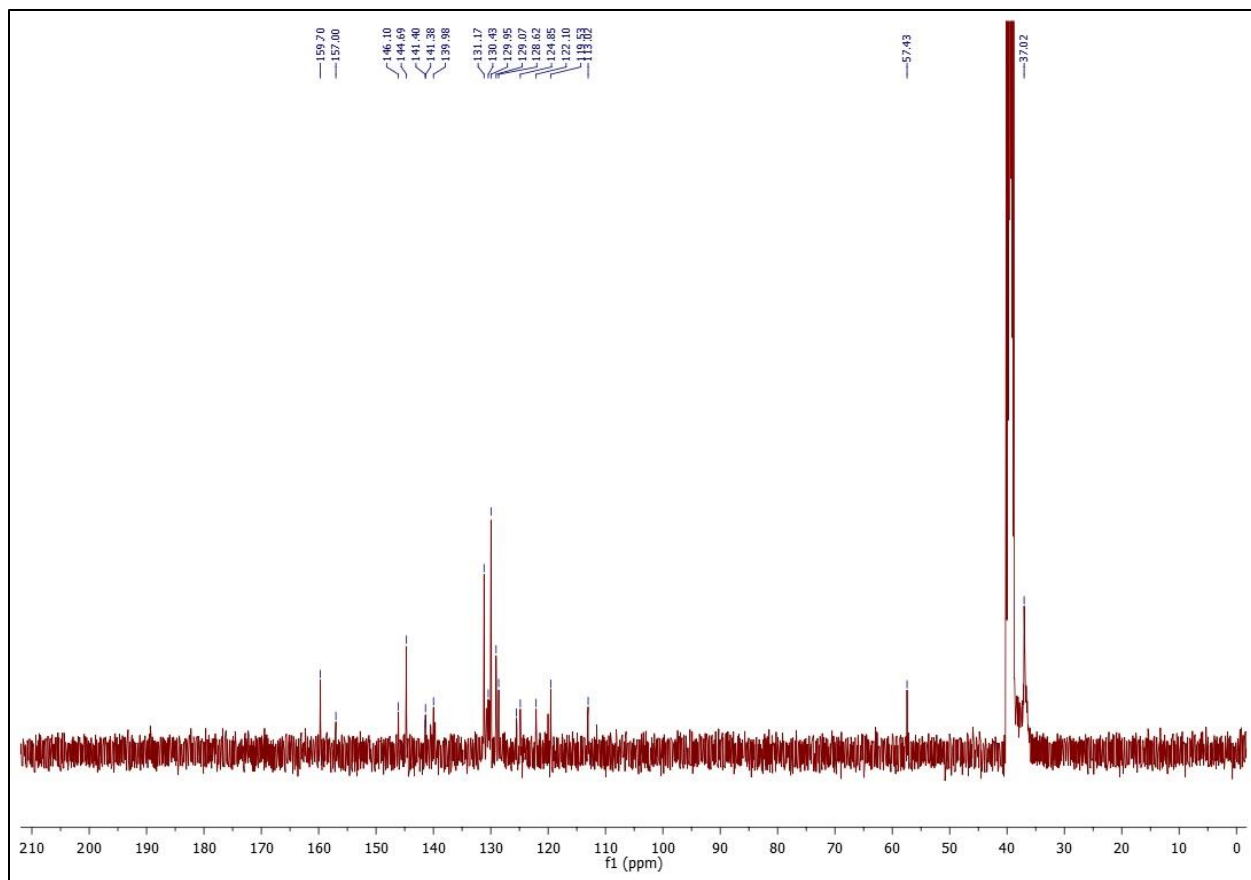

$^{13}\text{C}$  NMR of 5d

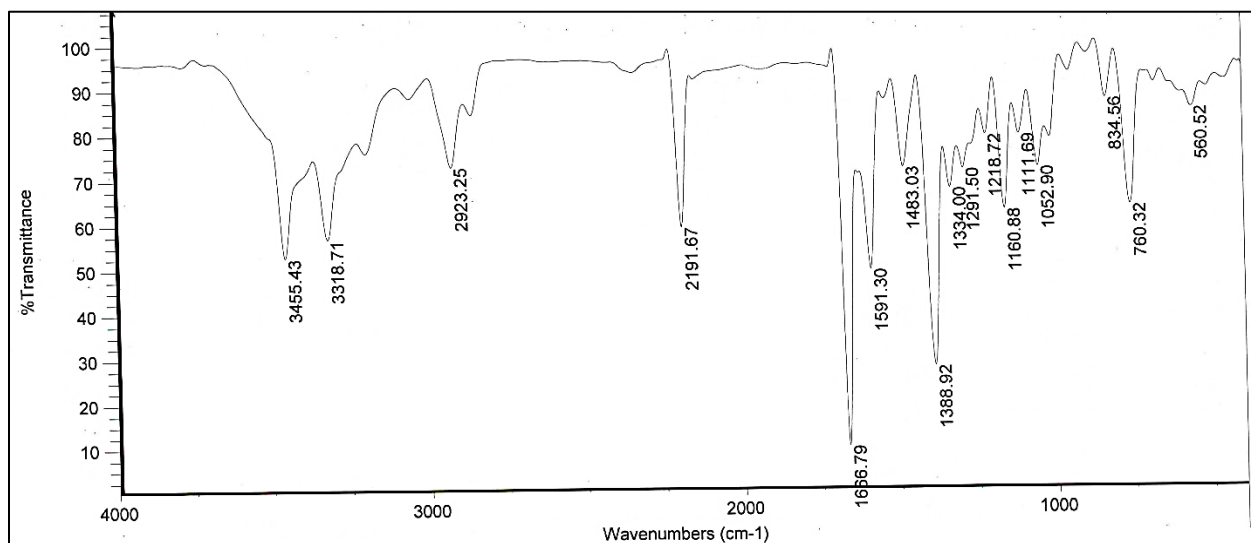

FTIR of 5e

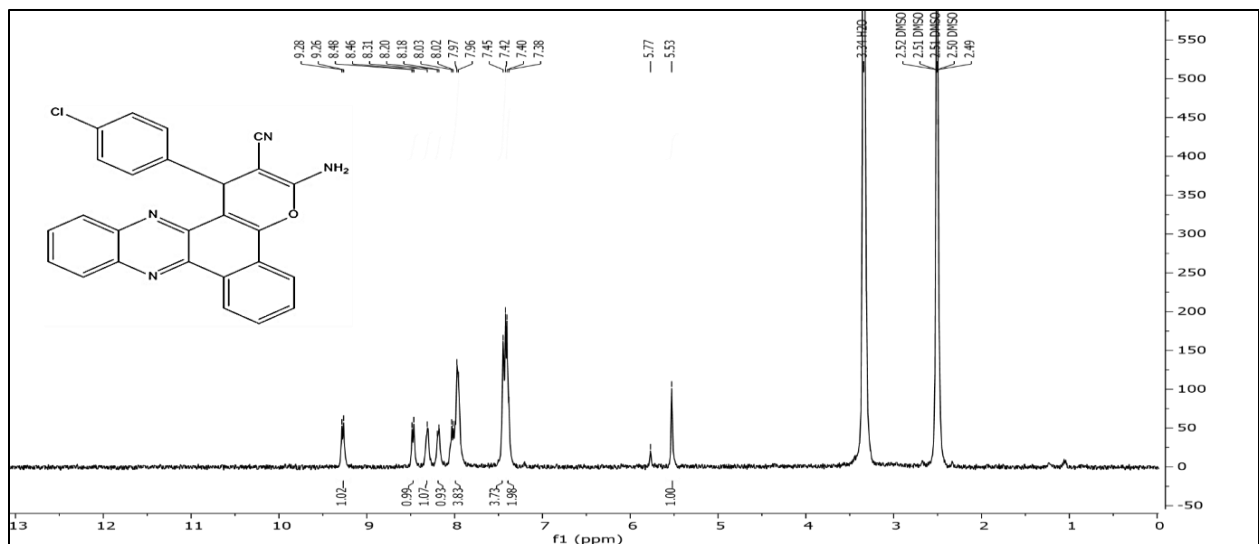

<sup>1</sup>H NMR of 5e

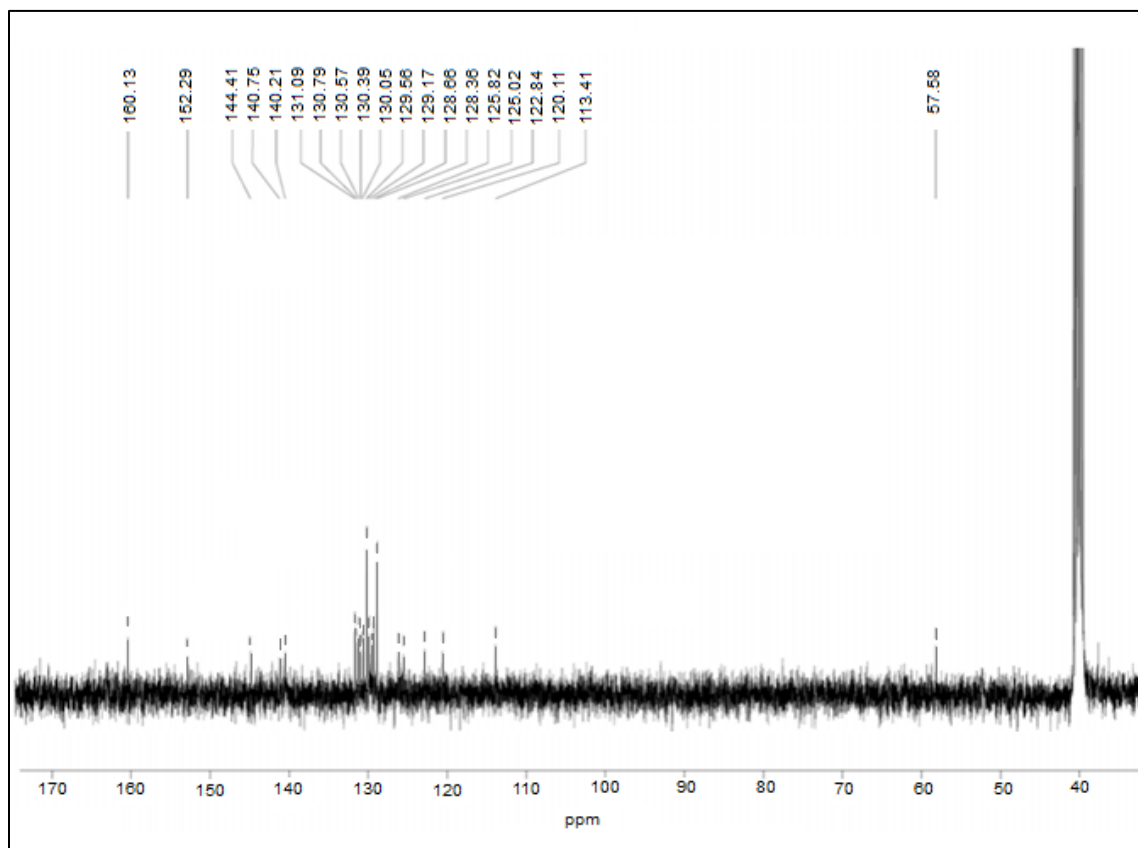

<sup>13</sup>C NMR of 5e

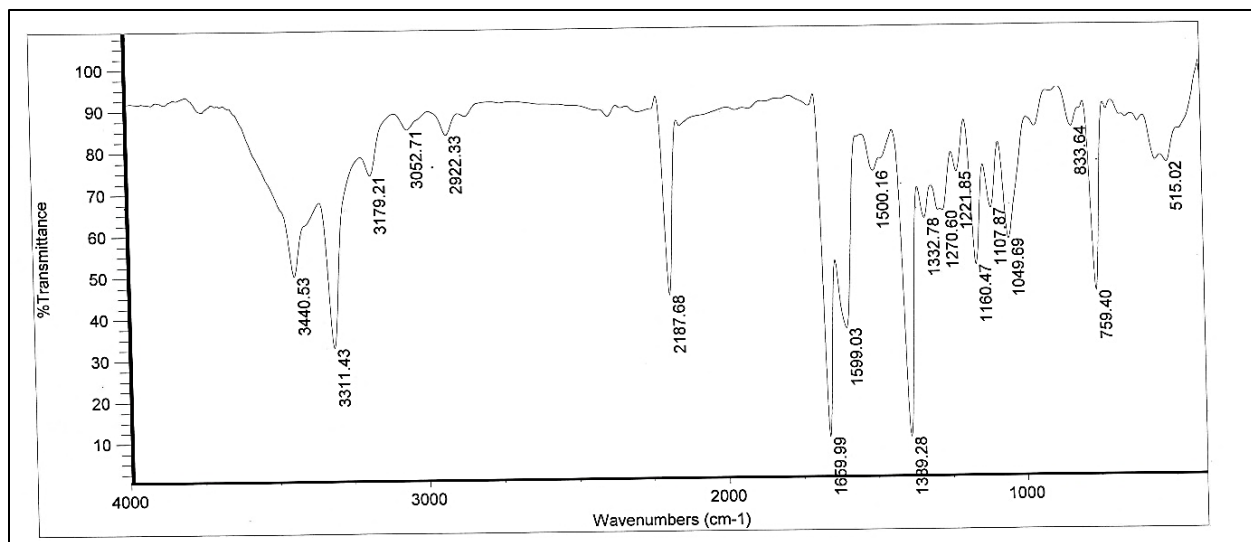

FTIR of 5f

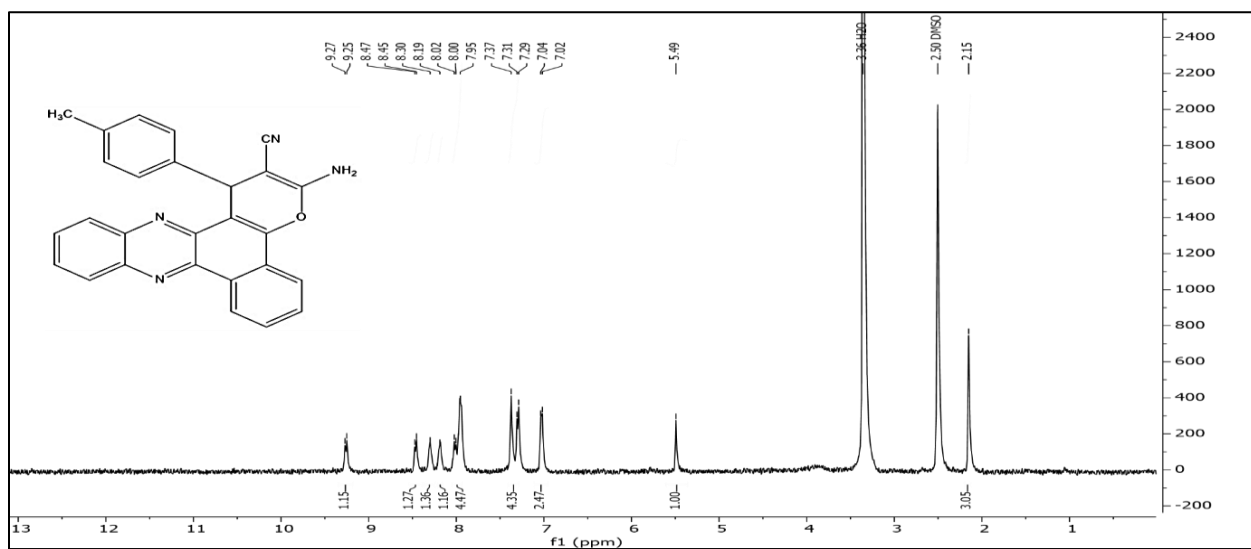

<sup>1</sup>H NMR of 5f



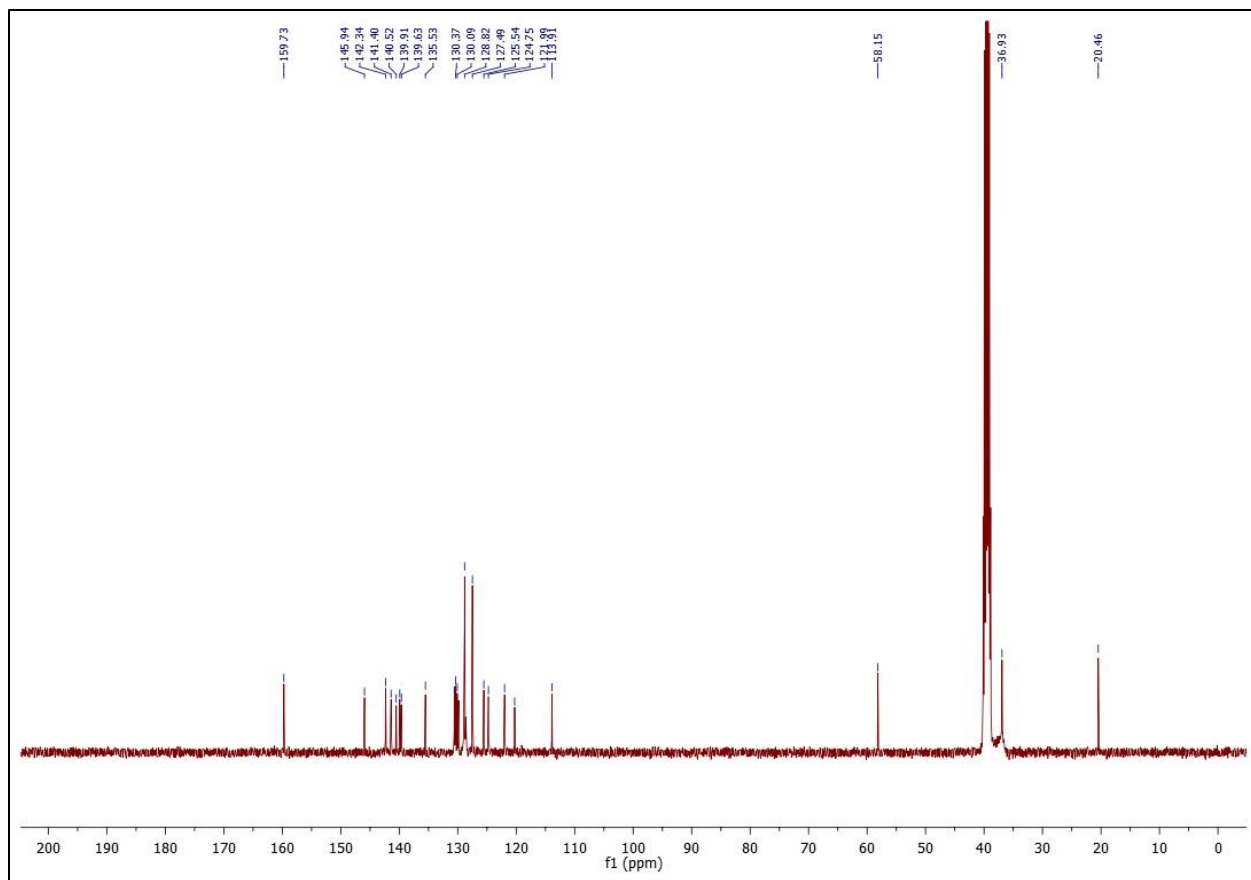

<sup>13</sup>C NMR of 5f

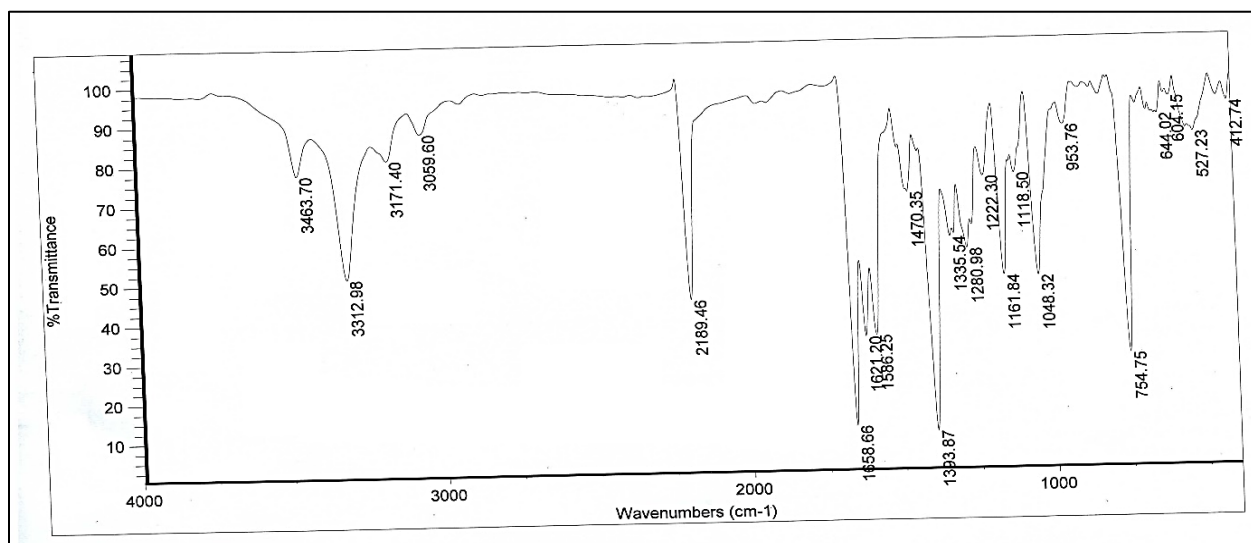

FTIR of 5g

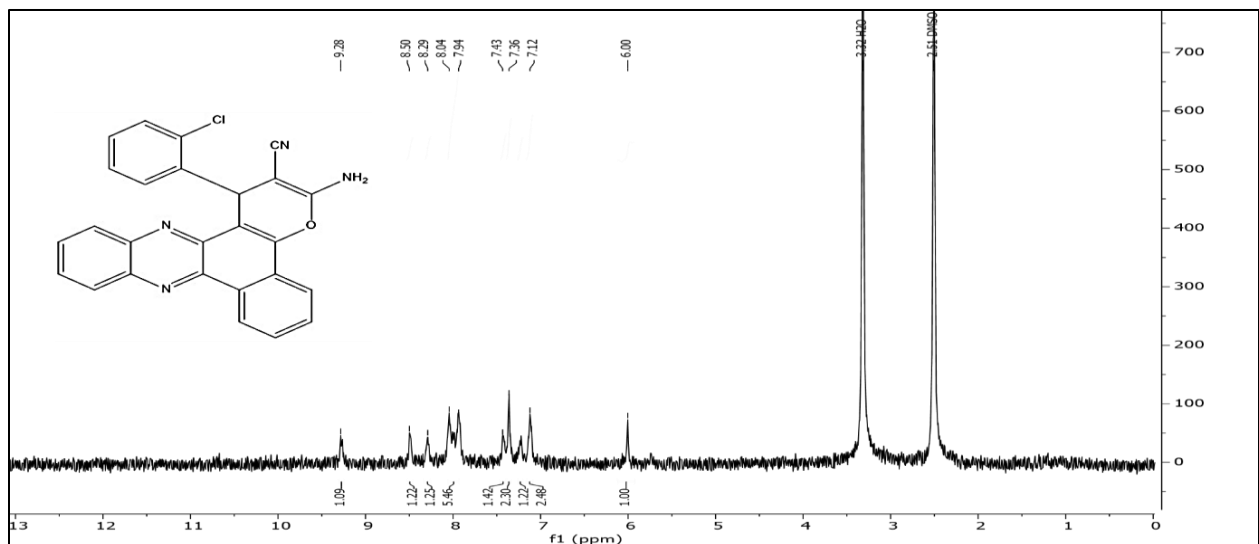

$^1\text{H}$ NMR of 5g

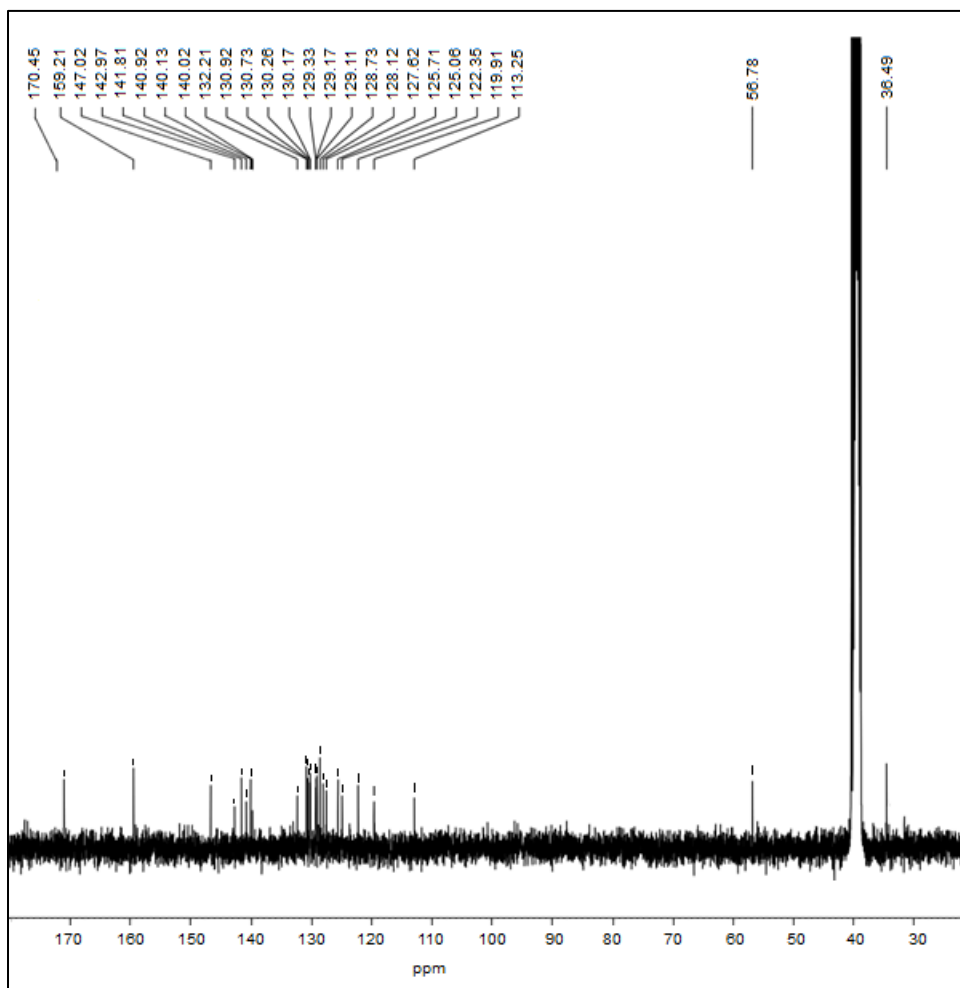

$^{13}\text{C}$  NMR of 5g

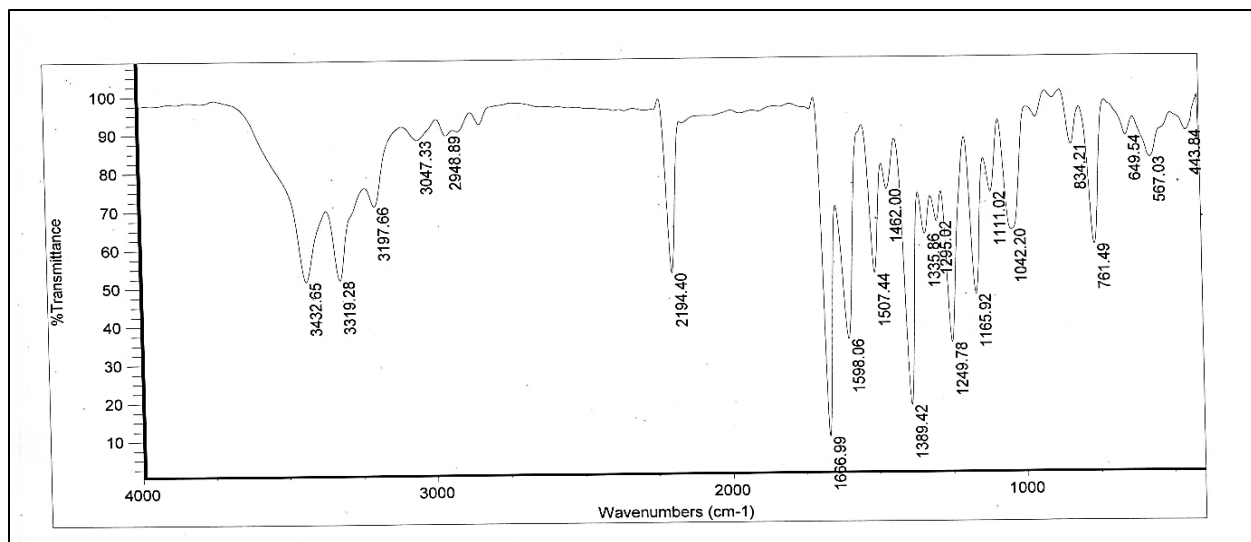

FTIR of 5h

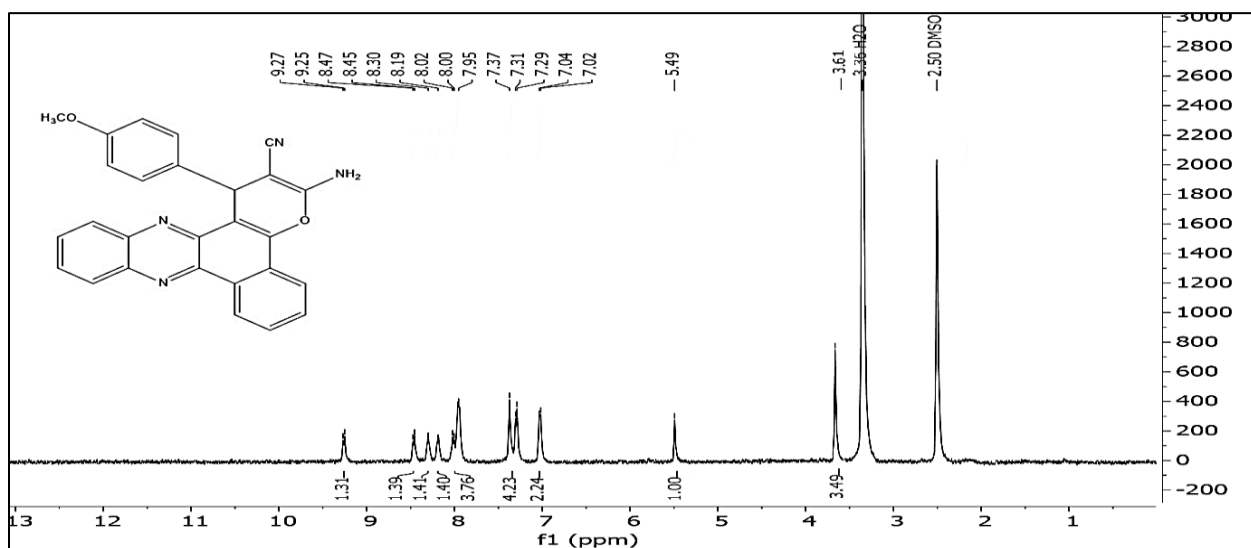

<sup>1</sup>H NMR of 5h

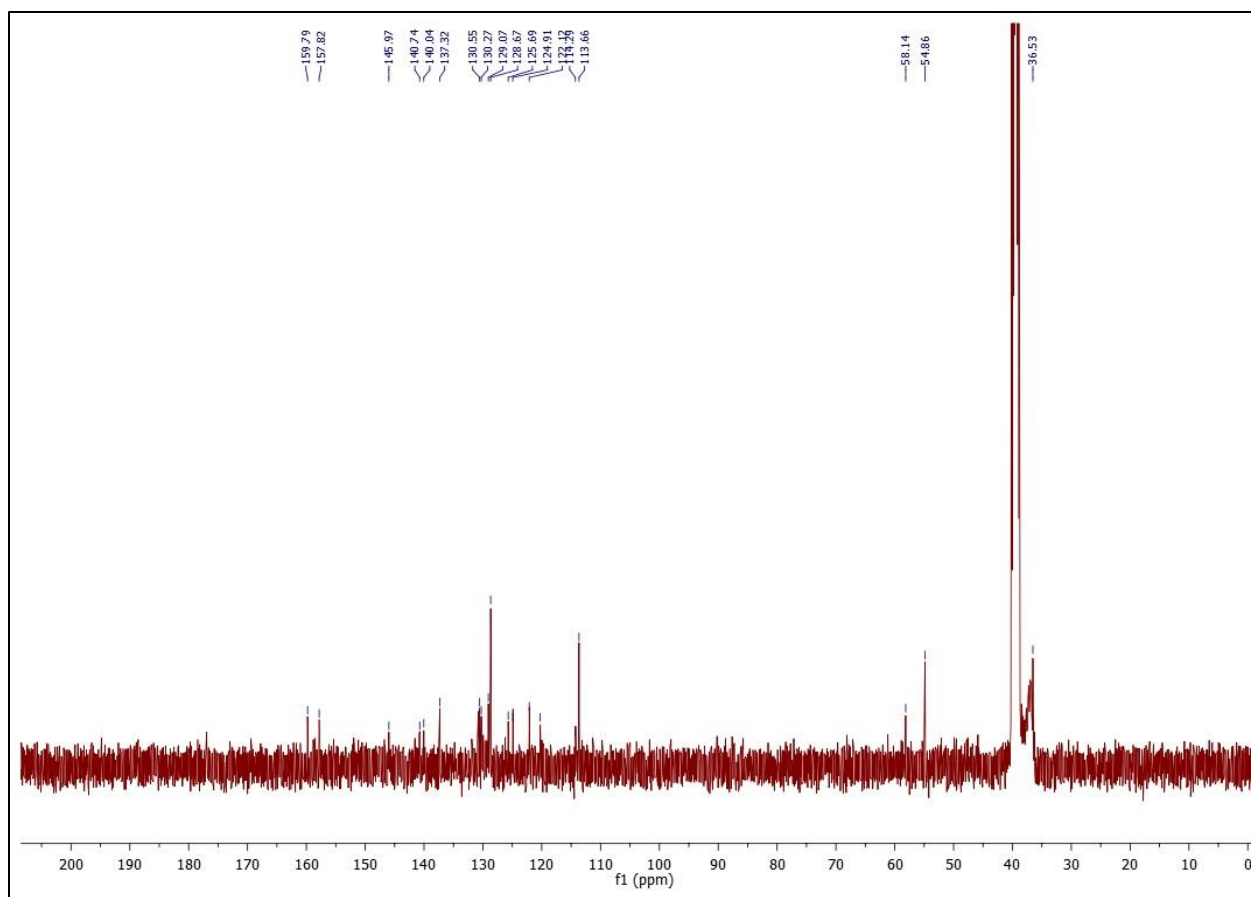

$^{13}\text{C}$  NMR of 5h

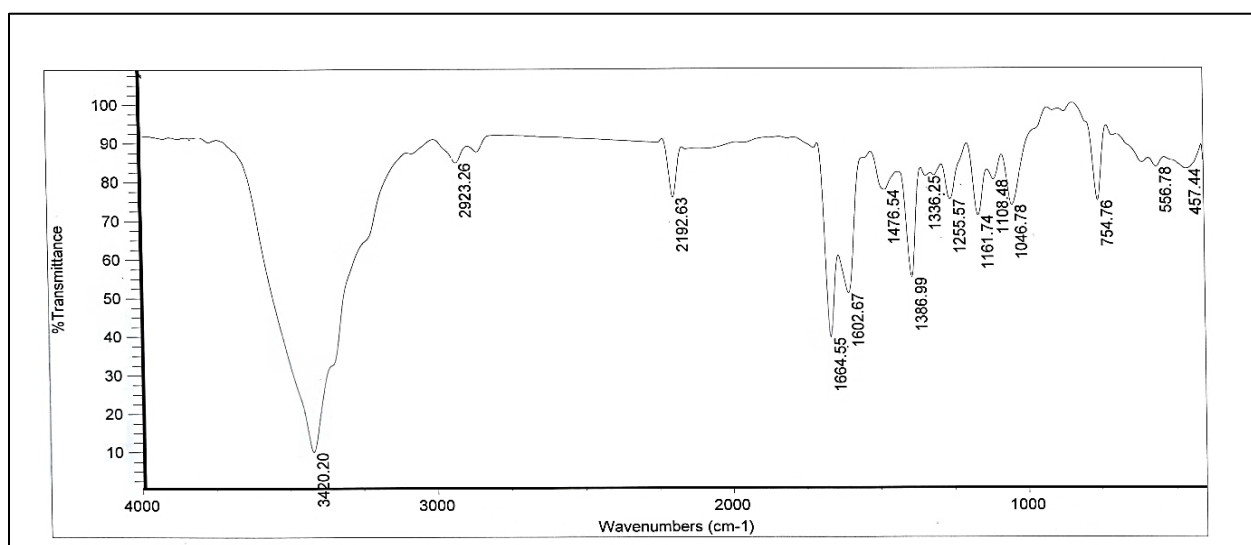

FTIR of 5i

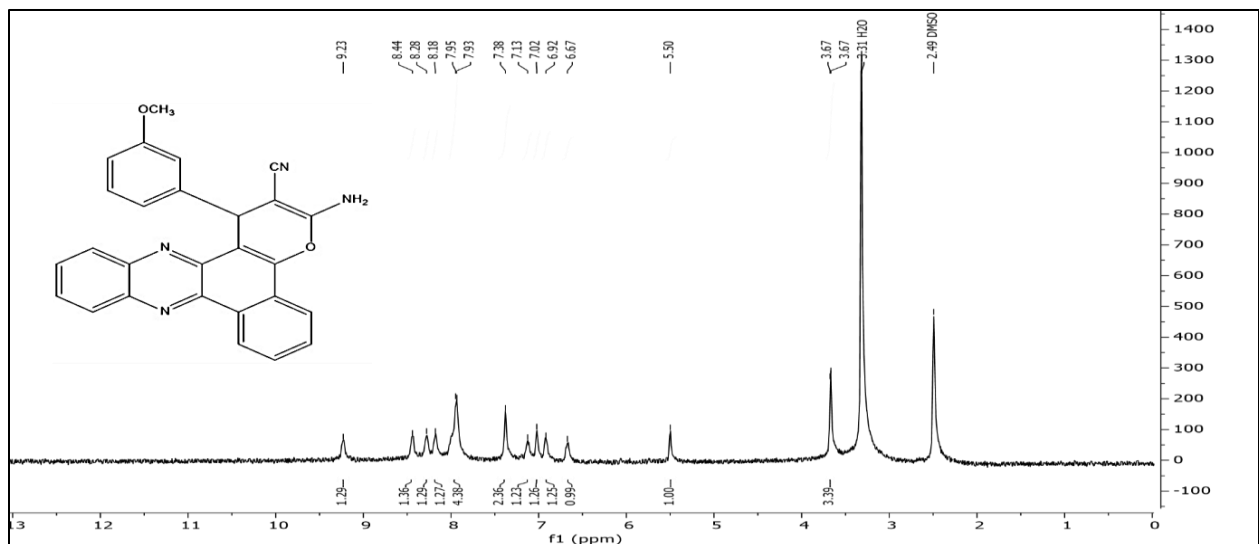

<sup>1</sup>H NMR of 5i

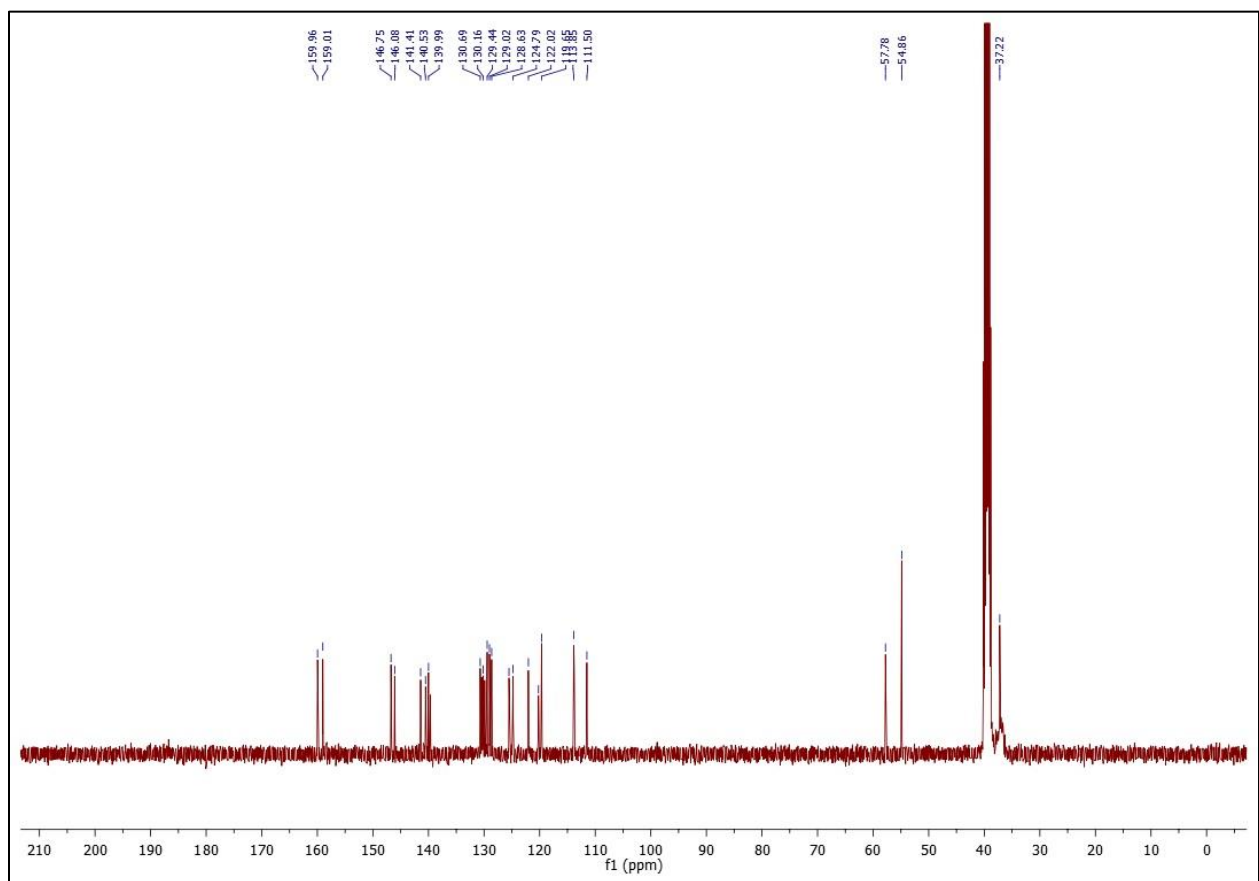

<sup>13</sup>C NMR of 5i

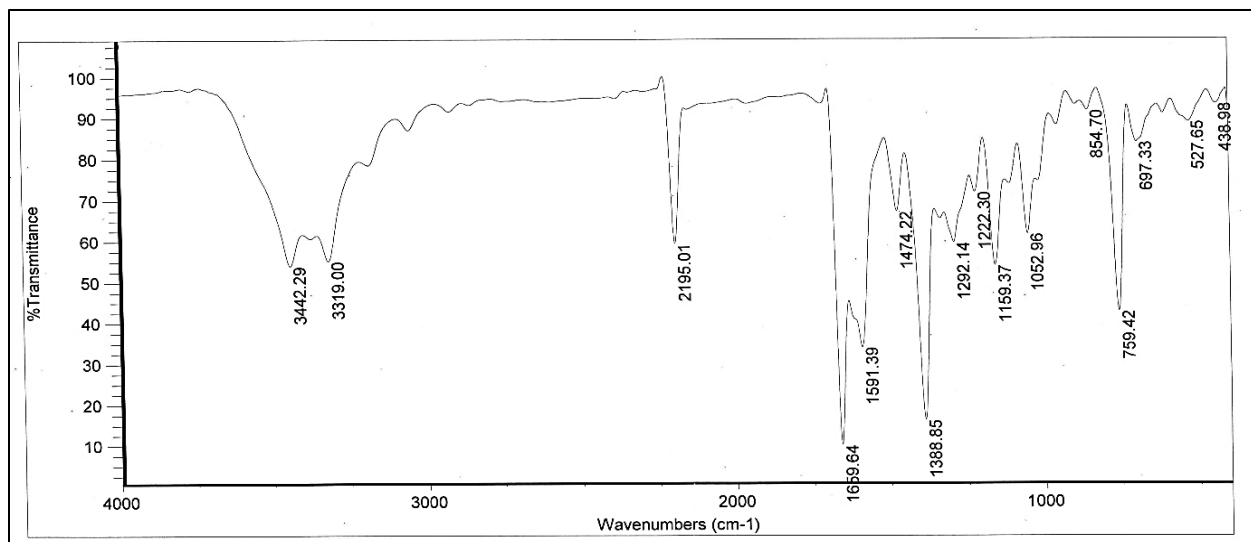

FTIR of 5j

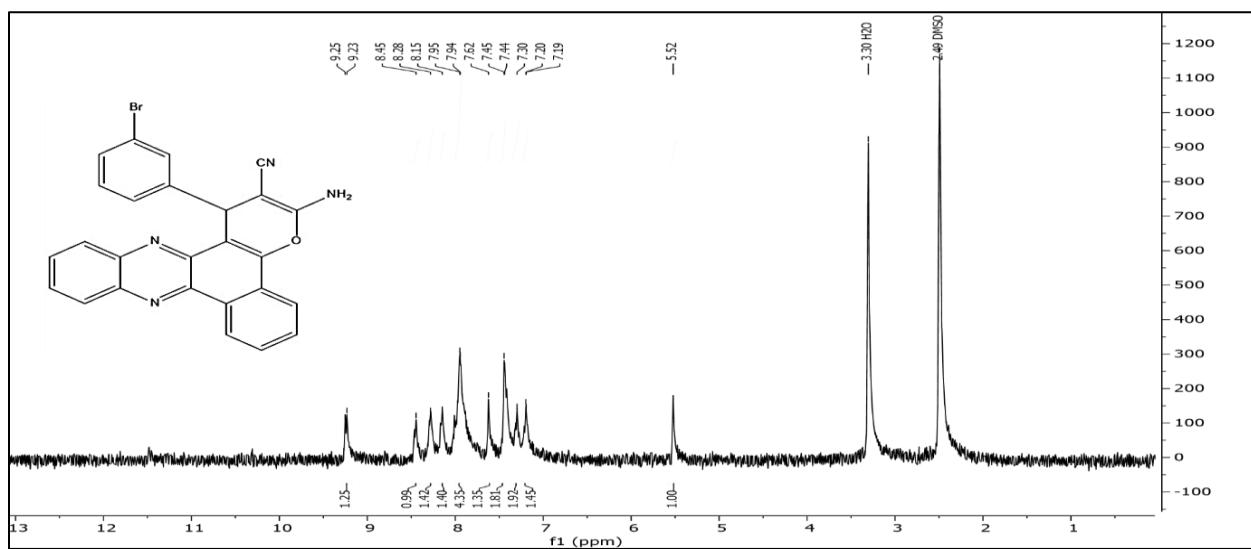

<sup>1</sup>H NMR of 5j

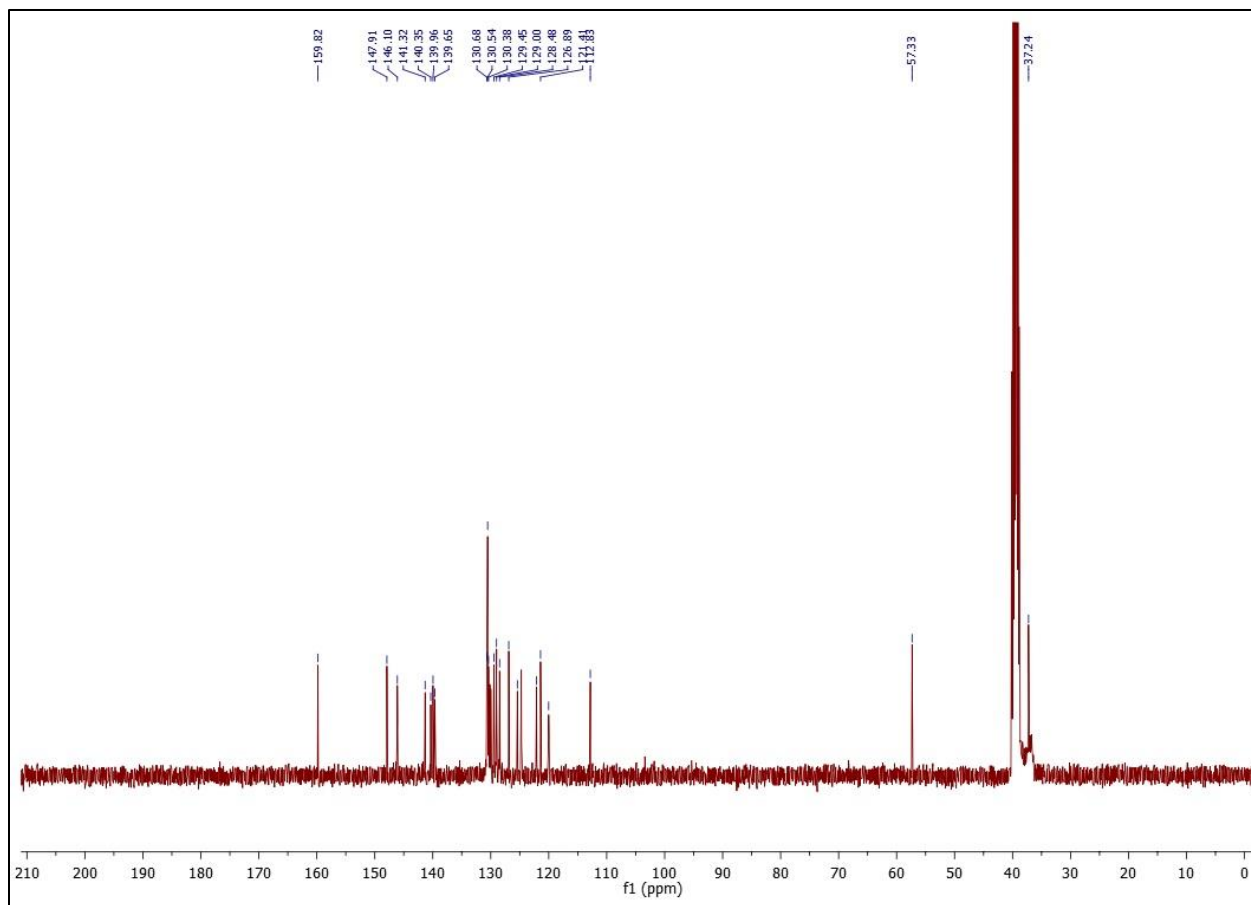

$^{13}\text{C}$  NMR of 5j

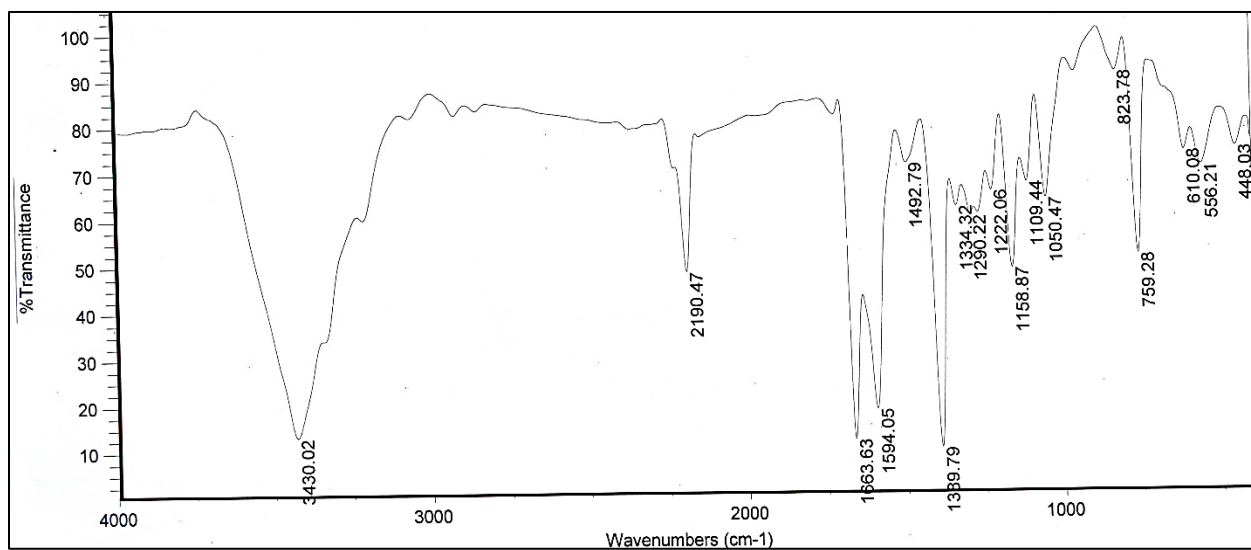

FTIR of 5k

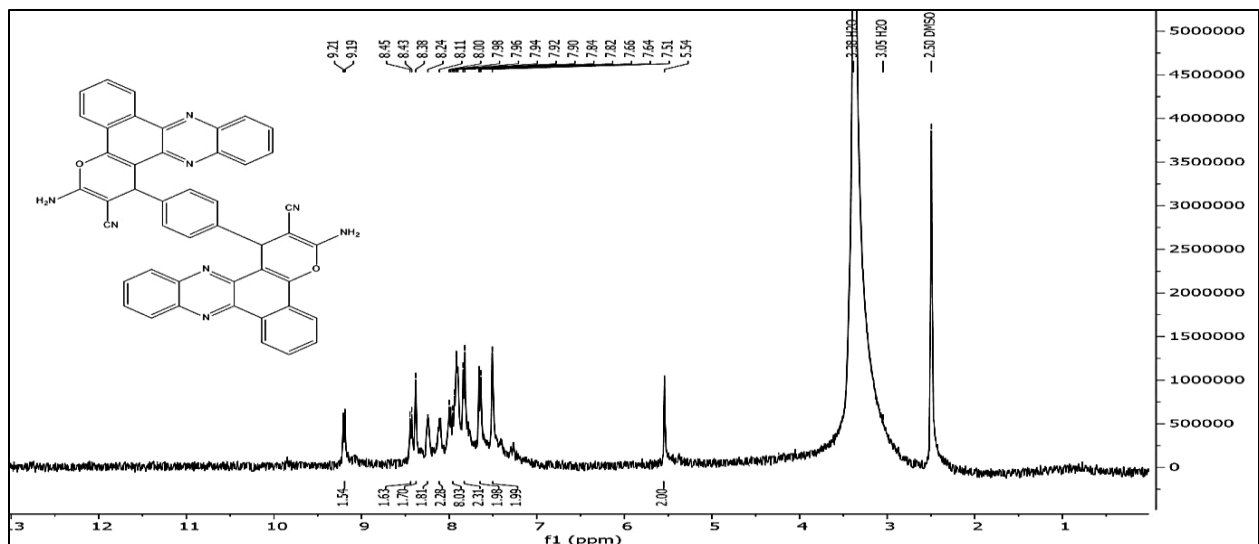

<sup>1</sup>H NMR of 5k

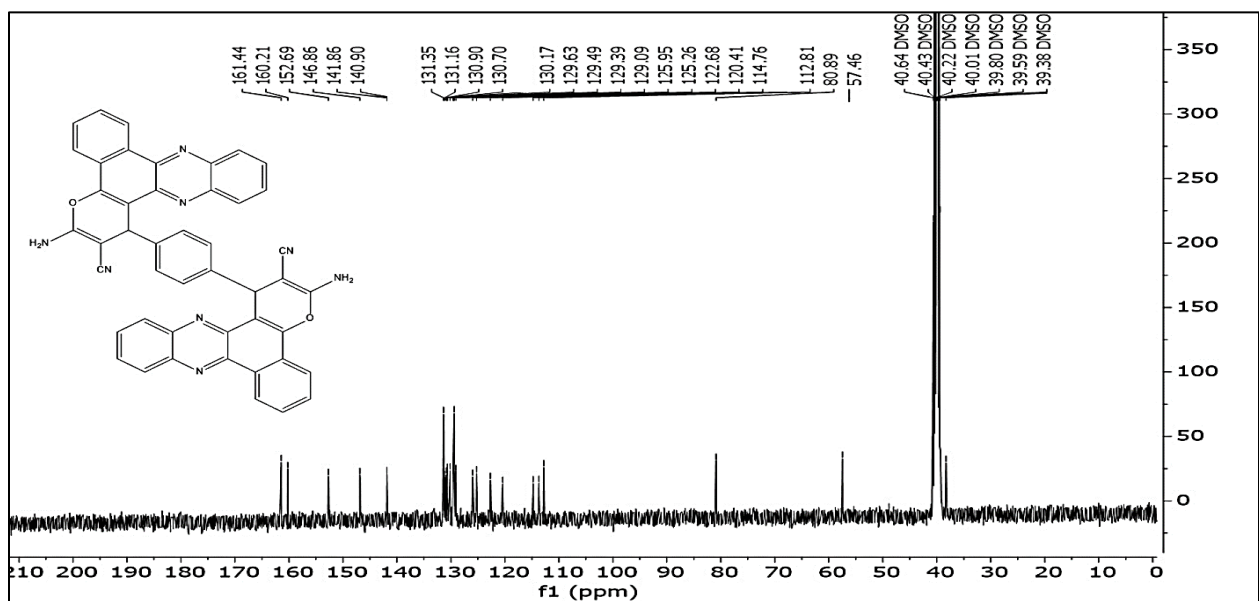

<sup>13</sup>C NMR of 5k



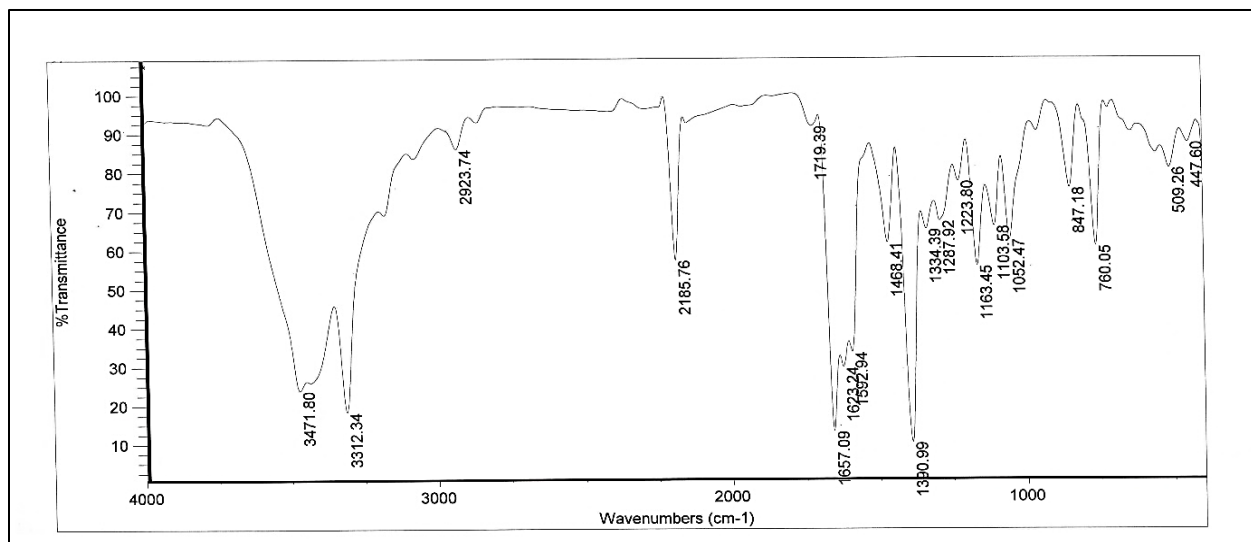

FTIR of 51

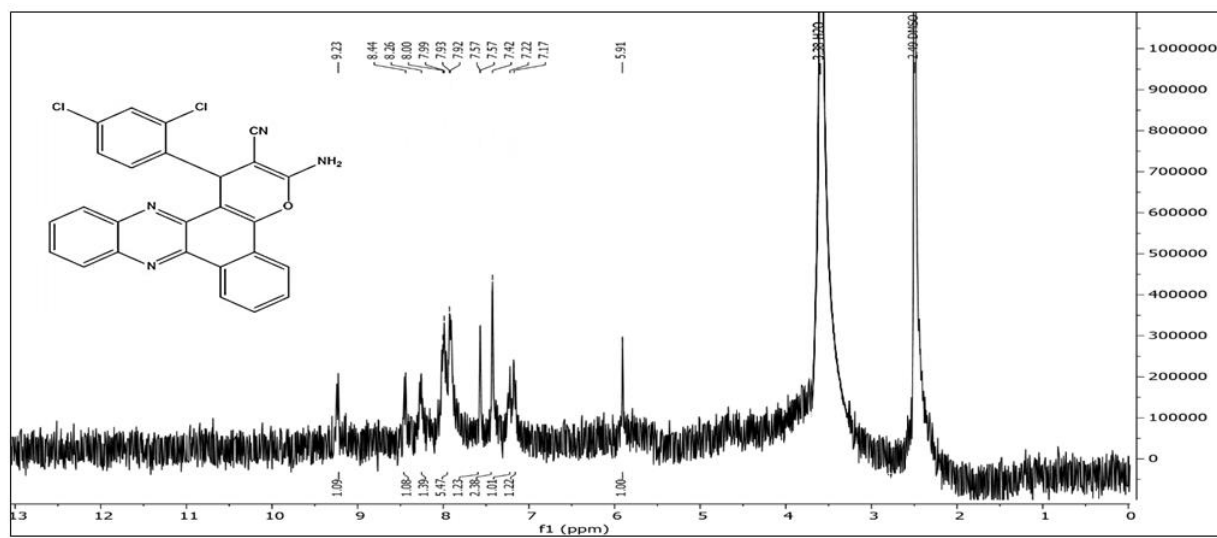

<sup>1</sup>H NMR of 51
